# Supplementary material for: Initial clinical and treatment patterns of advanced differentiated thyroid cancer: ERUDIT study
Source: PubMed Central journal article supplement — Eur Thyroid J. 2022 Jun 30;11(5):e210111. doi: 10.1530/ETJ-21-0111 (PMC9422238; doi:10.1530/etj-21-0111), 2022-06-30
Supplement: supplementary_table_1.pdf [file supplementary_table_1.pdf]

**Initial Clinical and Treatment Patterns of Advanced Differentiated Thyroid Cancer. ERUDIT Study.**  
 Juan Antonio Vallejo Casas<sup>1\*</sup>; Marcel Sambo<sup>2\*</sup>; Carlos López López<sup>3</sup> and Manuel Durán-Poveda<sup>4</sup> on  
 behalf of the ERUDIT Study group

Supplementary Table 1. List of Participant Sites in Spain and Portugal of the ERUDIT Study

| <b>Site Number - Name</b>                                                     | <b>De novo<br/>aDTC<br/>(N=115)</b> | <b>Recurrent / Progressive<br/>eDTC<br/>(N=98)</b> | <b>Total<br/>Cohort<br/>(N=213)</b> |
|-------------------------------------------------------------------------------|-------------------------------------|----------------------------------------------------|-------------------------------------|
| 01. Portuguese Institute of Oncology <sup>(1)</sup><br>(Lisboa)               | 42 (36.5)                           | 16 (16.3)                                          | 58 (27.2)                           |
| 02. Canary Islands University Hospital<br>(Canarias)                          | 8 (7.0)                             | 8 (8.2)                                            | 16 (7.5)                            |
| 03. Reina Sofia University Hospital<br>(Córdoba)                              | 5 (4.3)                             | 8 (8.2)                                            | 13 (6.1)                            |
| 04. Virgen del Rocío University Hospital<br>(Sevilla)                         | 4 (3.5)                             | 8 (8.2)                                            | 12 (5.6)                            |
| 05. Puerta de Hierro-Majadahonda<br>University Hospital (Madrid)              | 5 (4.3)                             | 6 (6.1)                                            | 11 (5.2)                            |
| 06. University Hospital of Santiago de<br>Compostela (Santiago de Compostela) | 5 (4.3)                             | 5 (5.1)                                            | 10 (4.7)                            |
| 07. Gregorio Marañón University Hospital <sup>(1)</sup><br>(Madrid)           | 4 (3.5)                             | 5 (5.1)                                            | 9 (4.2)                             |
| 08. 12 de Octubre University Hospital<br>(Madrid)                             | 1 (0.9)                             | 8 (8.2)                                            | 9 (4.2)                             |
| 09. Vall Hebron University Hospital<br>(Barcelona)                            | 4 (3.5)                             | 4 (4.1)                                            | 8 (3.8)                             |
| 10. Santa Creu i Sant Pau University<br>Hospital (Barcelona)                  | 6 (5.2)                             | 2 (2.0)                                            | 8 (3.8)                             |
| 11. Burgos University Hospital (Burgos)                                       | 3 (2.6)                             | 5 (5.1)                                            | 8 (3.8)                             |
| 12. La Fe University Hospital (Valencia)                                      | 6 (5.2)                             | 1 (1.0)                                            | 7 (3.3)                             |
| 13. Cruces University Hospital (Vizcaya)                                      | 4 (3.5)                             | 3 (3.1)                                            | 7 (3.3)                             |
| 14. University Hospital of Salamanca<br>(Salamanca)                           | 5 (4.3)                             | 2 (2.0)                                            | 7 (3.3)                             |
| 15. Ramon y Cajal University Hospital<br>(Madrid)                             | 1 (0.9)                             | 4 (4.1)                                            | 5 (2.3)                             |
| 16. Virgen de las Nieves University Hospital<br>(Granada)                     | 2 (1.7)                             | 3 (3.1)                                            | 5 (2.3)                             |
| 17. Doctor Peset University Hospital<br>(Valencia)                            | 3 (2.6)                             | 2 (2.0)                                            | 5 (2.3)                             |
| 18. Germans Trias i Pujol University Hospital<br>(Barcelona)                  | 3 (2.6)                             |                                                    | 3 (1.4)                             |
| 19. Clínica Universitaria de Navarra<br>(Pamplona)                            | 3 (2.6)                             |                                                    | 3 (1.4)                             |
| 20. Marqués de Valdecilla University<br>Hospital (Santander)                  |                                     | 3 (3.1)                                            | 3 (1.4)                             |
| 21. La Paz University Hospital (Madrid)                                       |                                     | 3 (3.1)                                            | 3 (1.4)                             |
| 22. Alvaro Cunqueiro University Hospital<br>(Vigo)                            | 1 (0.9)                             | 1 (1.0)                                            | 2 (0.9)                             |
| 23. Son Espases University Hospital<br>(Mallorca)                             |                                     | 1 (1.0)                                            | 1 (0.5)                             |

(1): Reference hospital.
