# Supplementary material for: Initial clinical and treatment patterns of advanced differentiated thyroid cancer: ERUDIT study
Source: PubMed Central journal article supplement — Eur Thyroid J. 2022 Jun 30;11(5):e210111. doi: 10.1530/ETJ-21-0111 (PMC9422238; doi:10.1530/etj-21-0111), 2022-06-30
Supplement: supplementary_table_2.pdf [file supplementary_table_2.pdf]

Supplementary Table 2. Diagnostic Methods Used at Initial Diagnosis (N=213)

| <b>Parameter</b>                                  | <b>Study population</b><br>No. (%) |
|---------------------------------------------------|------------------------------------|
| <b>Initial diagnosis of DTC and method, Cases</b> | 213                                |
| Incidental post- surgery                          | 45 (21.1)                          |
| No incidental                                     | 168 (78.9)                         |
| <b>Fine needle aspiration, Cases</b>              | 213                                |
| Yes                                               | 129 (60.6)                         |
| No                                                | 48 (22.5)                          |
| Unknown                                           | 36 (16.9)                          |
| <b>Image diagnosis methods, Cases</b>             | 180                                |
| Echography                                        | 101 (56.1)                         |
| CT                                                | 55 (30.6)                          |
| MRI                                               | 4 (2.2)                            |
| Others <sup>(1)</sup>                             | 20 (11.1)                          |

(1): Chest X-ray scintigraphy, and Eco doppler ultrasonography. CT: Computed tomography. MRI: Magnetic resonance imaging.
