# Supplementary material for: Initial clinical and treatment patterns of advanced differentiated thyroid cancer: ERUDIT study
Source: PubMed Central journal article supplement — Eur Thyroid J. 2022 Jun 30;11(5):e210111. doi: 10.1530/ETJ-21-0111 (PMC9422238; doi:10.1530/etj-21-0111), 2022-06-30
Supplement: supplementary_table_3.pdf [file supplementary_table_3.pdf]

Supplementary Table 3. Therapeutic Approach at Initial Diagnosis (N=213)

| Parameter                                                                      | Global Study Population (N=213) | De novo aDTC                | Recurrent / Progressive eDTC | p-Value         |
|--------------------------------------------------------------------------------|---------------------------------|-----------------------------|------------------------------|-----------------|
| <b>Surgery, Patients No. (%)</b>                                               | <b>209 (98.1)</b>               | <b>111 (100.0)</b>          | <b>98 (100.0)</b>            | <b>0.1263</b>   |
| Neck dissection                                                                | 157 (75.1)                      | 86 (77.5)                   | 71 (72.4)                    | 0.4014          |
| Surgery result, Patients No. (%)                                               |                                 |                             |                              | <0.0001 *       |
| R0                                                                             | 143 (68.4)                      | 66 (59.5)                   | 77 (78.6)                    |                 |
| R1                                                                             | 29 (13.9)                       | 16 (14.4)                   | 13 (13.3)                    |                 |
| R2                                                                             | 23 (11.0)                       | 22 (19.8)                   | 1 (1.0)                      |                 |
| Metastases resection                                                           | 8 (3.8)                         | 5 (4.5)                     | 3 (3.1)                      |                 |
| Other <sup>(1)</sup>                                                           | 5 (2.4)                         | 1 (0.9)                     | 4 (4.1)                      |                 |
| Unknown <sup>(2)</sup>                                                         | 1 (0.5)                         | 1 (0.9)                     | ..                           |                 |
| <b>RAI treatment, Patients No. (%)</b>                                         | <b>190 (89.2)</b>               | <b>97 (84.3)</b>            | <b>93 (94.9)</b>             | <b>0.0134 *</b> |
| Administered dose per intervention, Patients No, Median (Q1-Q3), mCi           | 189<br>150.0 (100.0 - 150.0)    | 97<br>150.0 (130.0 - 155.0) | 92<br>104.0 (100.0 - 150.0)  | <0.0001 *       |
| Cumulative RAI dose per intervention, Patients No., Median (Q1-Q3), mCi        |                                 |                             |                              |                 |
| First                                                                          | 189<br>150.0 (100.0 - 150.0)    | 97<br>150.0 (130.0 - 155.0) | 92<br>104.0 (100.0 - 150.0)  | <0.0001 *       |
| Second                                                                         | 116<br>300.0 (250.0 - 325.0)    | 67<br>300.0 (271.0 - 350.0) | 49<br>250.0 (200.0 - 300.0)  | <0.0001 *       |
| Third                                                                          | 57<br>450.0 (400.0 - 500.0)     | 40<br>450.0 (427.0 - 519.0) | 17<br>343.0 (300.0 - 400.0)  | <0.0001 *       |
| Use pre- RAI hrTSH per intervention, <sup>(3)</sup> Patients No. (%), Yes / No |                                 |                             |                              |                 |
| First                                                                          | 46 (24.2) / 136 (71.6)          | 28 (28.9) / 65 (67.0)       | 18 (19.4) / 71 (76.3)        | 0.1251          |
| Second                                                                         | 33 (17.4) / 73 (38.4)           | 24 (24.7) / 37 (38.1)       | 9 (9.7) / 36 (38.7)          | 0.0335          |

**Initial Clinical and Treatment Patterns of Advanced Differentiated Thyroid Cancer. ERUDIT Study.**

Juan Antonio Vallejo Casas<sup>1\*</sup>; Marcel Sambo<sup>2\*</sup>; Carlos López López<sup>3</sup> and Manuel Durán-Poveda<sup>4</sup> on behalf of the ERUDIT Study group

| Parameter                                                                                        | Global Study Population<br>(N=213) | De novo<br>aDTC       | Recurrent / Progressive<br>eDTC | p-Value         |
|--------------------------------------------------------------------------------------------------|------------------------------------|-----------------------|---------------------------------|-----------------|
| Third                                                                                            | 18 (9.5) / 33 (17.4)               | 14 (14.4) / 22 (22.7) | 4 (4.3) / 11 (11.8)             | 0.4053          |
| Most frequent response to RAI per intervention.<br>ATA criteria, <sup>(4)</sup> Patients No. (%) |                                    |                       |                                 |                 |
| First (Structural Incomplete)                                                                    | 117 (61.6)                         | 77 (79.4)             | 40 (43.0)                       | <0.0001 *       |
| Second (Structural Incomplete)                                                                   | 71 (37.4)                          | 52 (53.6)             | 19 (20.4)                       | <0.0001 *       |
| Third (Structural Incomplete)                                                                    | 44 (23.2)                          | 34 (35.1)             | 10 (10.8)                       | 0.0429 *        |
| <b>Radiotherapy,<sup>(5)</sup> Patients No. (%)</b>                                              | <b>21 (9.9)</b>                    | <b>17 (14.8)</b>      | <b>4 (4.5)</b>                  | <b>0.0090 *</b> |
| Administered dose, Cases No,                                                                     | 19                                 | 16                    | 3                               | 0.0288 *        |
| Median (Q1-Q3), Gy                                                                               | 30.0 (20.0 - 44.0)                 | 30.0 (20.0 - 40.0)    | 54.0 (46.0 - 70.0)              |                 |
| Response to radiotherapy, <sup>(6)</sup> Patients No. (%)                                        | 21                                 | 17                    | 4                               | 0.4027          |
| Complete Response                                                                                | 1 (4.8)                            | 1 (5.9)               | 0 (0.0)                         |                 |
| Partial Response                                                                                 | 2 (9.5)                            | 1 (5.9)               | 1 (25.0)                        |                 |
| Stable Disease                                                                                   | 11 (52.4)                          | 10 (58.8)             | 1 (25.0)                        |                 |
| Progression Disease                                                                              | 4 (19.0)                           | 3 (17.6)              | 1 (25.0)                        |                 |
| Not evaluable / No applicable                                                                    | 3 (14.3)                           | 2 (11.8)              | 1 (25.0)                        |                 |

(1): Resection of other lesions like adenopathies or metastases. (2): Records could not be retrieved from the electronic Case Report Form. (3): Following standard practice in Spain and Portugal, patients not receiving hrTSH prior to RAI, were deprived of LT4. (4): Haugen et al., 2016.<sup>(1)</sup> (5): The usage of other locoregional ablative techniques was anecdotal. (6): Parameters based on objective response followed the standard RECIST v1.1 definition while actual data was retrieved as it was recorded in the patients' medical records. As such, objective response rate is the sum of complete response plus partial response according to physician-reported best response to treatment. Stable disease and progressive disease also followed this general guidance. NA: Not applicable. R0: Microscopic complete resection. R1: Macroscopic resection with microscopic residual tumour. R2: Gross macroscopic residual tumour. (\*): Statistically significant (p<0.05).
