# Supplementary material for: Initial clinical and treatment patterns of advanced differentiated thyroid cancer: ERUDIT study
Source: PubMed Central journal article supplement — Eur Thyroid J. 2022 Jun 30;11(5):e210111. doi: 10.1530/ETJ-21-0111 (PMC9422238; doi:10.1530/etj-21-0111), 2022-06-30
Supplement: supplementary_table_4.pdf [file supplementary_table_4.pdf]

Supplementary Table 4. Kaplan Meier Univariate Analysis of Overall Survival in the Global Study Population (N=213)

| Parameters                                                | N   | Overall Survival (Kaplan Meier) |                       |                  |
|-----------------------------------------------------------|-----|---------------------------------|-----------------------|------------------|
|                                                           |     | Median (95%CI)                  | Hazard Ratio (95%CI)  | Log-rank p-value |
| <b>General variables</b>                                  |     |                                 |                       |                  |
| Age at diagnosis; years                                   |     |                                 |                       |                  |
| >=45 [ref.]                                               | 177 | 8.2 (6.2 - 10.4)                |                       |                  |
| <45                                                       | 36  | 35.6 (17.8 - 35.6)              | 0.176 (0.062 - 0.389) | <0.0001 *        |
| >=55 [ref.]                                               | 149 | 6.5 (5.7 - 8.7)                 |                       |                  |
| <55                                                       | 64  | 17.8 (15.3 - 35.6)              | 0.270 (0.150 - 0.454) | <0.0001 *        |
| Gender                                                    |     |                                 |                       |                  |
| Female [ref.]                                             | 126 | 12.5 (8.7 - 16.2)               |                       |                  |
| Male                                                      | 87  | 7.3 (5.4 - 17.8)                | 1.399 (0.939 - 2.072) | 0.0942           |
| <b>Variables of initial diagnosis and first treatment</b> |     |                                 |                       |                  |
| Histology                                                 |     |                                 |                       |                  |
| Papillary [ref.]                                          | 125 | 14.9 (8.7 - 16.8)               |                       |                  |
| Follicular                                                | 39  | 6.4 (5.1 - 11.1)                | 1.520 (0.907 - 2.460) | 0.4213           |
| Hürthel                                                   | 21  | 12.5 (5.8 - 17.6)               | 1.132 (0.561 - 2.078) |                  |
| Others                                                    | 24  | NE (4.3 - NE)                   | 1.203 (0.596 - 2.210) |                  |
| Diagnosis type                                            |     |                                 |                       |                  |
| Recurrent [ref.]                                          | 98  | 15.3 (10.4 - 17.8)              |                       |                  |
| Novo                                                      | 115 | 6.4 (5.1 - NE)                  | 2.381 (1.559 - 3.698) | <0.0001 *        |
| Surgery                                                   |     |                                 |                       |                  |
| R2 [ref.]                                                 | 23  | 5.1 (2.4 - 5.2)                 |                       |                  |
| R0/R1                                                     | 172 | 12.5 (8.7 - 16.2)               | 0.282 (0.170 - 0.494) | <0.0001 *        |
| Others <sup>(1)</sup>                                     | 13  | 17.8 (5.1 - 35.6)               | 0.236 (0.084 - 0.574) |                  |
| Surgical extension                                        |     |                                 |                       |                  |
| Thyroidectomy total [ref.]                                | 137 | 11.1 (8.2 - 17.6)               |                       |                  |
| Thyroidectomy partial + others <sup>(2)</sup>             | 72  | 10.4 (6.4 - 16.8)               | 1.171 (0.772 - 1.751) | 0.4471           |

| Parameters                                                     | N   | Overall Survival (Kaplan Meier) |                        |                  |
|----------------------------------------------------------------|-----|---------------------------------|------------------------|------------------|
|                                                                |     | Median (95%CI)                  | Hazard Ratio (95%CI)   | Log-rank p-value |
| Disease extension                                              |     |                                 |                        |                  |
| Locoregional [ref.]                                            | 14  | 8.6 (0.7 - 12.5)                |                        |                  |
| Metastatic                                                     | 199 | 10.4 (7.3 - 16.0)               | 0.617 (0.319 - 1.383)  | 0.1869           |
| Ablative RAI +/- local therapies                               |     |                                 |                        |                  |
| Yes [ref.]                                                     | 190 | 11.1 (8.6 - 17.6)               |                        |                  |
| No                                                             | 23  | 3.0 (0.5 - 12.5)                | 2.480 (1.439 - 4.038)  | 0.0003 *         |
| RAI Refractoriness at initial diagnosis                        |     |                                 |                        |                  |
| No [ref.]                                                      | 200 | 11.1 (8.6 - 16.2)               |                        |                  |
| Yes                                                            | 13  | 0.7 (0.3 - 3.1)                 | 6.018 (3.008 - 10.903) | <0.0001 *        |
| RAI Cumulative dose                                            |     |                                 |                        |                  |
| >=600 mCi [ref.]                                               | 29  | 11.1 (6.5 - 17.8)               |                        |                  |
| <600 mCi                                                       | 160 | 9.5 (7.2 - 16.2)                | 1.411 (0.782 - 2.815)  | 0.0013 *         |
| No RAI treatment <sup>(3)</sup>                                | 23  | 3.0 (0.5 - 12.5)                | 3.267 (1.556 - 7.171)  |                  |
| RAI with stimulating agent at first instance <sup>(4)</sup>    |     |                                 |                        |                  |
| No [ref.]                                                      | 136 | 14.9 (8.6 - 17.8)               |                        |                  |
| Yes                                                            | 46  | 10.4 (5.5 - NE)                 | 1.286 (0.767 - 2.081)  | 0.3195           |
| RAI Response at first instance. ATA criteria <sup>(5)</sup>    |     |                                 |                        |                  |
| Excellent [ref.]                                               | 18  | NE (8.6 - NE)                   |                        |                  |
| Biochemical Incomplete + Indeterminate                         | 53  | 11.1 (7.2 - 16.2)               | 2.821 (1.090 - 9.606)  | 0.0159 *         |
| Structural Incomplete                                          | 117 | 8.7 (6.2 - NE)                  | 3.885 (1.570 - 12.949) |                  |
| RAI-scan positivity after initial RAI <sup>(6)</sup> treatment |     |                                 |                        |                  |
| No [ref.]                                                      | 26  | 17.8 (9.2 - NE)                 |                        |                  |
| Yes                                                            | 133 | 9.5 (7.1 - 16.2)                | 1.897 (0.989 - 4.038)  | 0.0678           |

(1): Resection of other lesions such as adenopathy or metastasis. (2): Pathological lymph node dissections or metastasectomies; RAI, Radioactive Iodine (I-131). (3): Patients

**Initial Clinical and Treatment Patterns of Advanced Differentiated Thyroid Cancer. ERUDIT Study.**

Juan Antonio Vallejo Casas<sup>1\*</sup>; Marcel Sambo<sup>2\*</sup>; Carlos López López<sup>3</sup> and Manuel Durán-Poveda<sup>4</sup> on behalf of the ERUDIT Study group

not receiving RAI because of it not being clinically indicated or having tumours with negative RAI scans. (4): Following standard practice in Spain and Portugal, patients not receiving hrTSH prior to RAI, were deprived of LT4. (5): Haugen et al., 2016 (1). (6): Refers to 6-12 months follow-up post-treatment scans in patients that could have received surgery ± RAI as first therapeutic approach (Types 1, 3, and 4). [ref.]: Reference category. CI: Confidence interval. NE: Non-Estimable. R0: Microscopic complete resection. R1: Macroscopic resection with microscopic residual tumour. R2: Gross macroscopic residual tumour. (\*): Statistically significant ( $p < 0.05$ ).
