# Supplementary material for: Initial clinical and treatment patterns of advanced differentiated thyroid cancer: ERUDIT study
Source: PubMed Central journal article supplement — Eur Thyroid J. 2022 Jun 30;11(5):e210111. doi: 10.1530/ETJ-21-0111 (PMC9422238; doi:10.1530/etj-21-0111), 2022-06-30
Supplement: supplementary_table_5.pdf [file supplementary_table_5.pdf]

Supplementary Table 5. Kaplan-Meier Univariate Analysis of (RP)FS and Time to develop aDTC/RR-DTC in eDTC Cohort (N=98)

| Parameters                                                | N  | (RP)FS           |                       |                  | Time to develop aDTC/RR-DTC |                       |                  |
|-----------------------------------------------------------|----|------------------|-----------------------|------------------|-----------------------------|-----------------------|------------------|
|                                                           |    | Median (95%CI)   | Hazard Ratio (95%CI)  | Log-rank p-value | Median (95%CI)              | Hazard Ratio (95%CI)  | Log-rank p-value |
| <b>General variables</b>                                  |    |                  |                       |                  |                             |                       |                  |
| Age at diagnosis, years                                   |    |                  |                       |                  |                             |                       |                  |
| >=45 [ref.]                                               | 76 | 2.4 (1.8 - 3.0)  |                       |                  | 2.3 (1.5 - 2.9)             |                       |                  |
| <45                                                       | 22 | 2.8 (1.2 - 5.3)  | 0.841 (0.505 - 1.343) | 0.4863           | 2.3 (1.2 - 3.9)             | 0.932 (0.560 - 1.486) | 0.7769           |
| >=55 [ref.]                                               | 56 | 2.3 (1.5 - 3.0)  |                       |                  | 2.2 (1.3 - 3.0)             |                       |                  |
| <55                                                       | 42 | 2.6 (1.4 - 3.9)  | 0.867 (0.573 - 1.299) | 0.4912           | 2.3 (1.4 - 3.4)             | 0.936 (0.619 - 1.401) | 0.7488           |
| Gender                                                    |    |                  |                       |                  |                             |                       |                  |
| Female [ref.]                                             | 61 | 2.8 (1.8 - 3.9)  |                       |                  | 2.8 (1.8 - 3.9)             |                       |                  |
| Male                                                      | 37 | 2.2 (1.3 - 3.0)  | 1.467 (0.957 - 2.223) | 0.0722           | 1.9 (1.3 - 2.4)             | 1.675 (1.086 - 2.554) | 0.0167 *         |
| <b>Variables of initial diagnosis and first treatment</b> |    |                  |                       |                  |                             |                       |                  |
| Histology                                                 |    |                  |                       |                  |                             |                       |                  |
| Papillary [ref.]                                          | 58 | 2.6 (1.8 - 4.5)  |                       |                  | 2.4 (1.8 - 3.7)             |                       |                  |
| Follicular                                                | 13 | 1.3 (0.9 - 7.7)  | 0.981 (0.506 - 1.764) | 0.6357           | 1.3 (0.9 - 7.6)             | 0.979 (0.505 - 1.761) | 0.6810           |
| Hürthel                                                   | 16 | 2.5 (1.1 - 3.9)  | 1.333 (0.733 - 2.297) |                  | 2.0 (0.9 - 3.9)             | 1.360 (0.749 - 2.336) |                  |
| Others                                                    | 11 | 2.3 (0.9 - 4.7)  | 1.380 (0.681 - 2.547) |                  | 2.3 (0.9 - 4.7)             | 1.266 (0.626 - 2.331) |                  |
| Surgical outcome                                          |    |                  |                       |                  |                             |                       |                  |
| R2 [ref.]                                                 | 1  | 0.1 (NE - NE)    |                       |                  | 0.1 (NE - NE)               |                       |                  |
| R0/R1                                                     | 90 | 2.3 (1.8 - 3.0)  | 0.022 (0.002 - 0.463) | <0.0001 *        | 2.3 (1.8 - 2.9)             | 0.021 (0.002 - 0.453) | <0.0001 *        |
| Others <sup>(1)</sup>                                     | 7  | 3.7 (0.1 - 13.0) | 0.012 (0.001 - 0.271) |                  | 1.7 (0.1 - 3.7)             | 0.018 (0.002 - 0.415) |                  |
| Surgical extension                                        |    |                  |                       |                  |                             |                       |                  |
| Thyroidectomy total [ref.]                                | 67 | 2.3 (1.8 - 3.3)  |                       |                  | 2.3 (1.5 - 3.0)             |                       |                  |

| Parameters                                                  | N  | (RP)FS           |                       |                  | Time to develop aDTC/RR-DTC |                       |                  |
|-------------------------------------------------------------|----|------------------|-----------------------|------------------|-----------------------------|-----------------------|------------------|
|                                                             |    | Median (95%CI)   | Hazard Ratio (95%CI)  | Log-rank p-value | Median (95%CI)              | Hazard Ratio (95%CI)  | Log-rank p-value |
| Thyroidectomy partial + others <sup>(2)</sup>               | 31 | 2.7 (1.0 - 4.7)  | 1.098 (0.705 - 1.675) | 0.6695           | 1.9 (1.0 - 3.9)             | 1.181 (0.758 - 1.802) | 0.4501           |
| Disease extension                                           |    |                  |                       |                  |                             |                       |                  |
| Locoregional [ref.]                                         | 10 | 1.7 (0.1 - 3.4)  |                       |                  | 1.7 (0.1 - 3.4)             |                       |                  |
| Metastatic                                                  | 88 | 2.4 (1.8 - 3.4)  | 0.531 (0.285 - 1.102) | 0.0591           | 2.3 (1.8 - 2.9)             | 0.571 (0.307 - 1.183) | 0.0949           |
| Ablative RAI +/- local therapies                            |    |                  |                       |                  |                             |                       |                  |
| Yes [ref.]                                                  | 93 | 2.3 (1.8 - 2.9)  |                       |                  | 2.2 (1.7 - 2.8)             |                       |                  |
| No                                                          | 5  | 9.0 (0.1 - 14.4) | 0.488 (0.171 - 1.094) | 0.1142           | 9.0 (0.1 - 14.4)            | 0.469 (0.164 - 1.056) | 0.0961           |
| RAI Refractoriness at initial diagnosis                     |    |                  |                       |                  |                             |                       |                  |
| No [ref.]                                                   | 97 | 2.4 (1.8 - 3.3)  |                       |                  | 2.3 (1.8 - 2.9)             |                       |                  |
| Yes                                                         | 1  | 0.1 (NE - NE)    | 47.9 (2.232 - 500.92) | <0.0001 *        | 0.1 (NE - NE)               | 47.9 (2.232 - 500.92) | <0.0001 *        |
| RAI cumulative dose                                         |    |                  |                       |                  |                             |                       |                  |
| >=600 mCi [ref.]                                            | 5  | 8.4 (3.9 - 13.0) |                       |                  | 5.3 (1.7 - 9.3)             |                       |                  |
| <600 mCi                                                    | 87 | 2.2 (1.4 - 2.7)  | 2.257 (1.007 - 6.445) | 0.0384 *         | 2.1 (1.3 - 2.6)             | 1.446 (0.648 - 4.118) | 0.1300           |
| No RAI treatment <sup>(3)</sup>                             | 5  | 9.0 (0.1 - 14.4) | 0.940 (0.260 - 3.396) |                  | 9.0 (0.1 - 14.4)            | 0.612 (0.168 - 2.228) |                  |
| RAI with Sensitizing agent at first instance                |    |                  |                       |                  |                             |                       |                  |
| No [ref.]                                                   | 71 | 2.4 (1.9 - 3.4)  |                       |                  | 2.3 (1.8 - 2.9)             |                       |                  |
| Yes                                                         | 18 | 0.9 (0.6 - 2.2)  | 2.404 (1.364 - 4.042) | 0.0010 *         | 0.9 (0.6 - 1.9)             | 2.232 (1.269 - 3.744) | 0.0027 *         |
| RAI Response at First Instance. ATA criteria <sup>(4)</sup> |    |                  |                       |                  |                             |                       |                  |
| Excellent [ref.]                                            | 13 | 5.8 (1.8 - 11.1) |                       |                  | 5.8 (1.8 - 10.7)            |                       |                  |
| Biochemical Incomplete + Indeterminate                      | 38 | 2.5 (1.8 - 3.4)  | 2.365 (1.203 - 5.103) | 0.0014 *         | 2.5 (1.8 - 3.4)             | 2.366 (1.200 - 5.121) | 0.0010 *         |
| Structural Incomplete                                       | 40 | 1.2 (0.9 - 2.4)  | 3.489 (1.778 - 7.515) |                  | 1.1 (0.9 - 2.1)             | 3.572 (1.818 - 7.701) |                  |

**Initial Clinical and Treatment Patterns of Advanced Differentiated Thyroid Cancer. ERUDIT Study.**

Juan Antonio Vallejo Casas<sup>1\*</sup>; Marcel Sambo<sup>2\*</sup>; Carlos López López<sup>3</sup> and Manuel Durán-Poveda<sup>4</sup> on behalf of the ERUDIT Study group

| Parameters                                                        | N  | (RP)FS          |                       |                  | Time to develop aDTC/RR-DTC |                       |                  |
|-------------------------------------------------------------------|----|-----------------|-----------------------|------------------|-----------------------------|-----------------------|------------------|
|                                                                   |    | Median (95%CI)  | Hazard Ratio (95%CI)  | Log-rank p-value | Median (95%CI)              | Hazard Ratio (95%CI)  | Log-rank p-value |
| RAI-scan positivity after initial <sup>(5)</sup><br>RAI treatment |    |                 |                       |                  |                             |                       |                  |
| No [ref.]                                                         | 19 | 5.8 (2.4 - 9.2) |                       |                  | 4.8 (2.2 - 8.1)             |                       |                  |
| Yes                                                               | 53 | 1.8 (1.2 - 2.6) | 2.737 (1.577 - 5.015) | 0.0004 *         | 1.8 (1.0 - 2.5)             | 2.347 (1.366 - 4.240) | 0.0023 *         |

(1) Resection of other lesions such as adenopathy or metastasis. (2): Lobectomies and Lymphadenectomies + others; RAI, Radioactive Iodine (I-131). (3) Patients that did not receive RAI treatment because were not susceptible of receive it (either clinically not required or no-RAI uptake). (4): Haugen et al., 2016 (1). (5): Refers to 6-12 months follow-up post-treatment scans in patients that could have received surgery ± RAI as first therapeutic approach (Types 1, 3, and 4). [ref.]: Reference category. R0: Microscopic complete resection. R1: Macroscopic resection with microscopic residual tumour. R2: Gross macroscopic residual tumour. (RP)FS: Relapse/Progression-free survival (a composite variable to describe the time elapsed from reception of upfront or initial diagnosis until death, relapse into aDTC in patients who were initially free of disease, in the cohort of patients originally diagnosed with early disease, or structural progression into aDTC in patients who had initial residual disease, respectively). CI: Confidence interval. NE: Non-Estimable. (\*): Statistically significant (p<0.05).
